# Supplementary material for: Harnessing interrupted Fischer in continuous flow: sustainable synthesis of (spiro)indolenine and (spiro)indoline privileged scaffolds
Source: Royal Society of Chemistry journal article supplement (doi:10.1039/d0re00329h), 2020-01-01

## SUPPORTING INFORMATION

### **Harnessing interrupted Fischer in continuous flow: sustainable synthesis of (spiro)indolenine and (spiro)indoline privileged scaffolds**

Antonella Ilenia Alfano<sup>a</sup>, Angela Zampella<sup>a</sup>, Ettore Novellino<sup>a</sup>, Margherita Brindisi<sup>a,\*</sup> and Heiko Lange<sup>a,\*</sup>

<sup>a</sup> SPOTS-LAB - Sustainable Pharmaceutical and Organic Technology and Synthesis Laboratory, University of Naples 'Federico II', Department of Pharmacy, Via Domenico Montesano 49, 80131 Naples, Italy.

\* Corresponding authors: heiko.lange@unina.it, margherita.brindisi@unina.it

#### **Table of Contents**

|                                                                             |             |
|-----------------------------------------------------------------------------|-------------|
| <sup>1</sup> H NMR and <sup>13</sup> C NMR spectra for compounds 10a-i..... | Pages S2-S6 |
|-----------------------------------------------------------------------------|-------------|

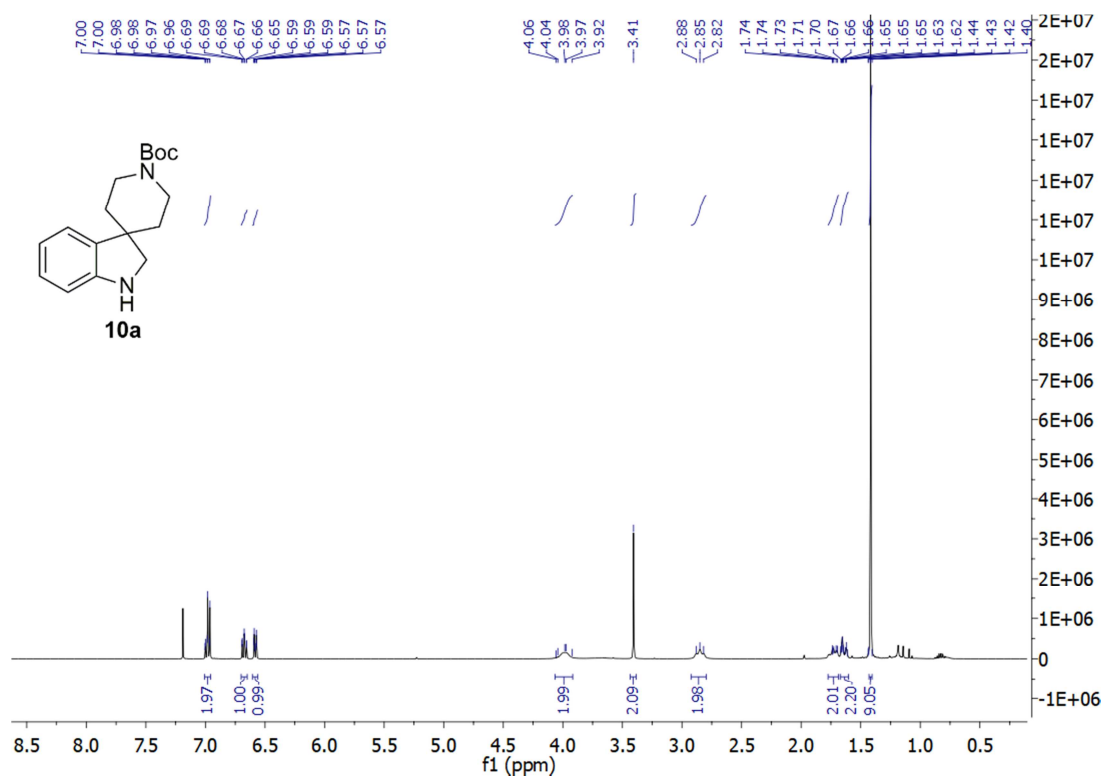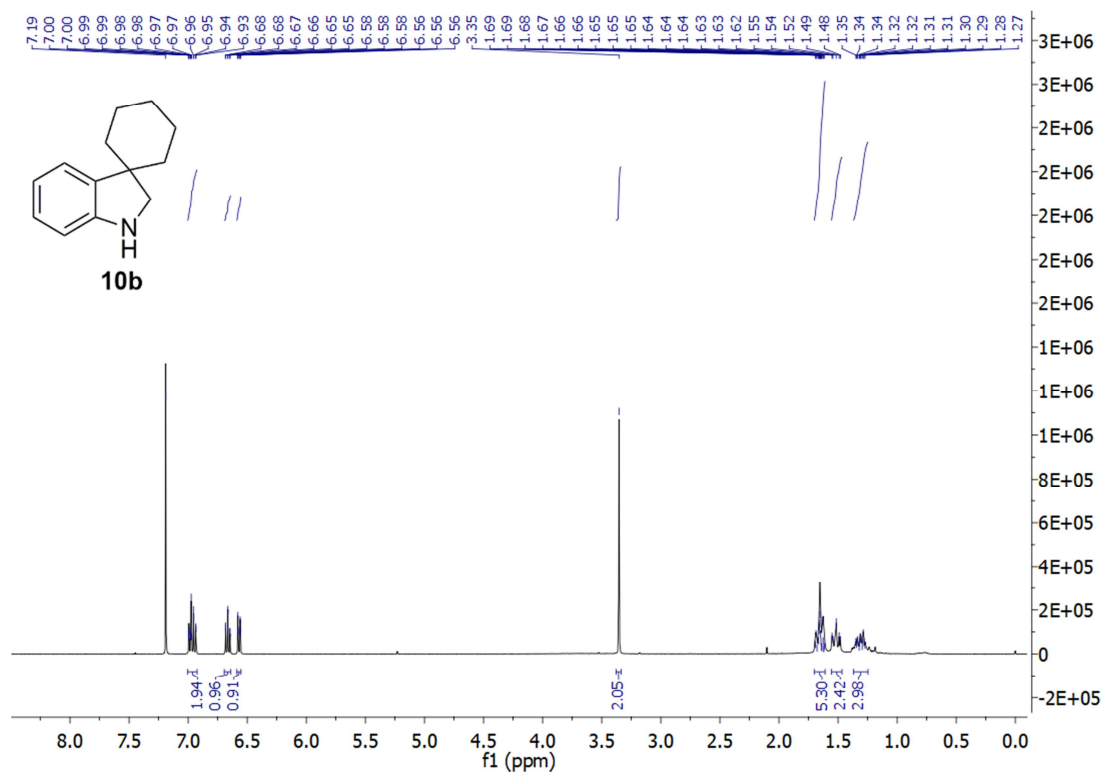

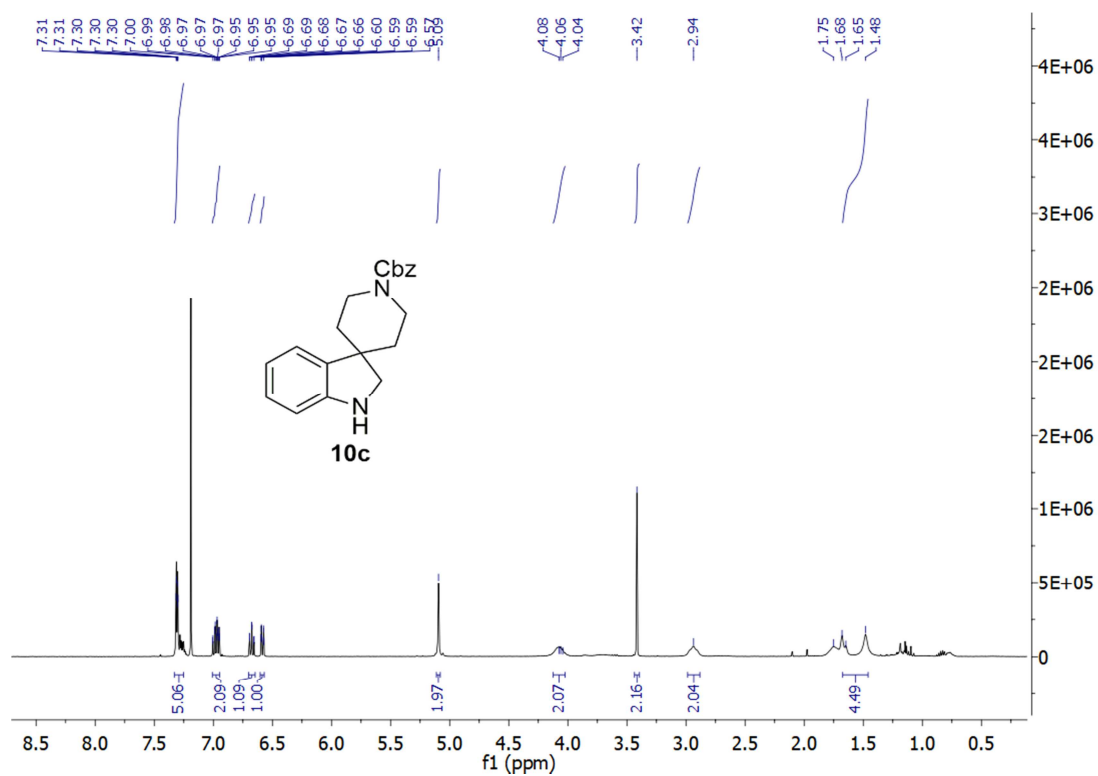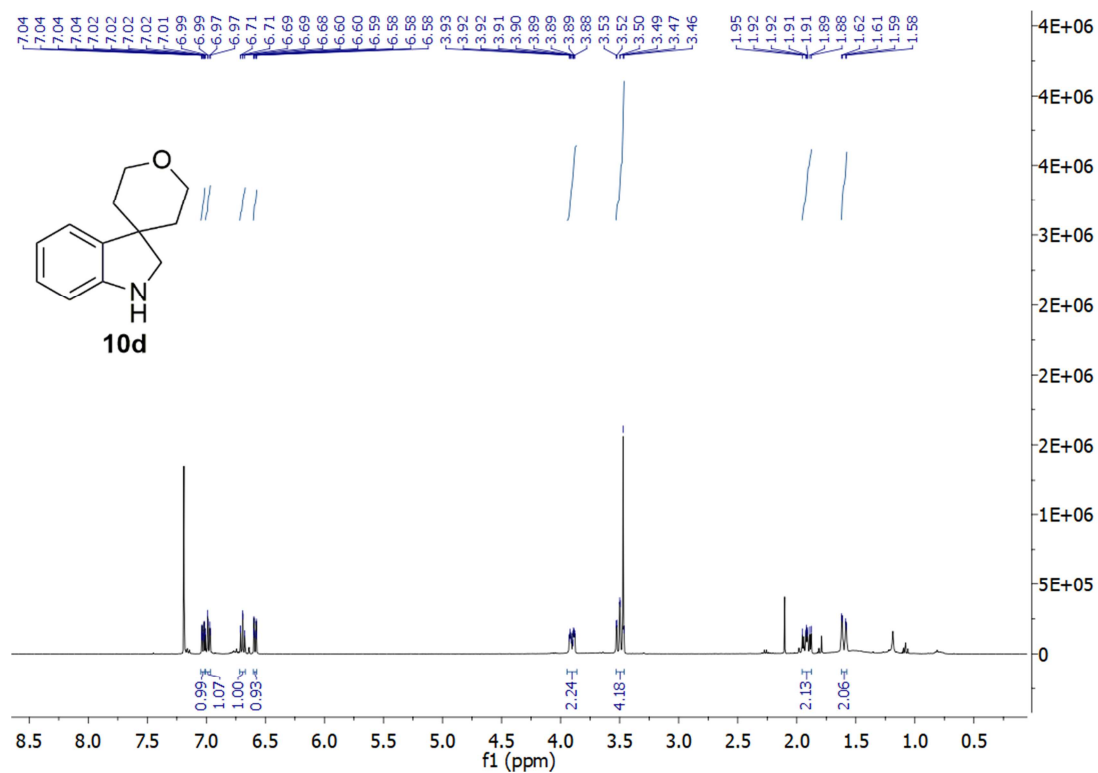

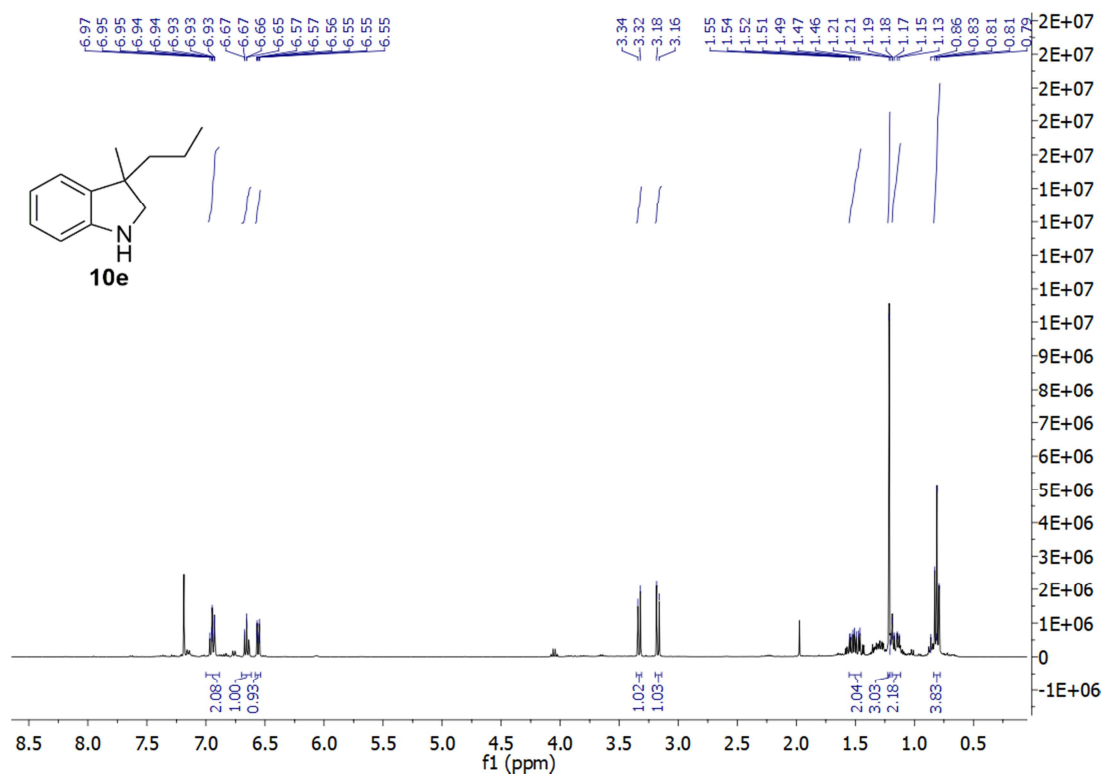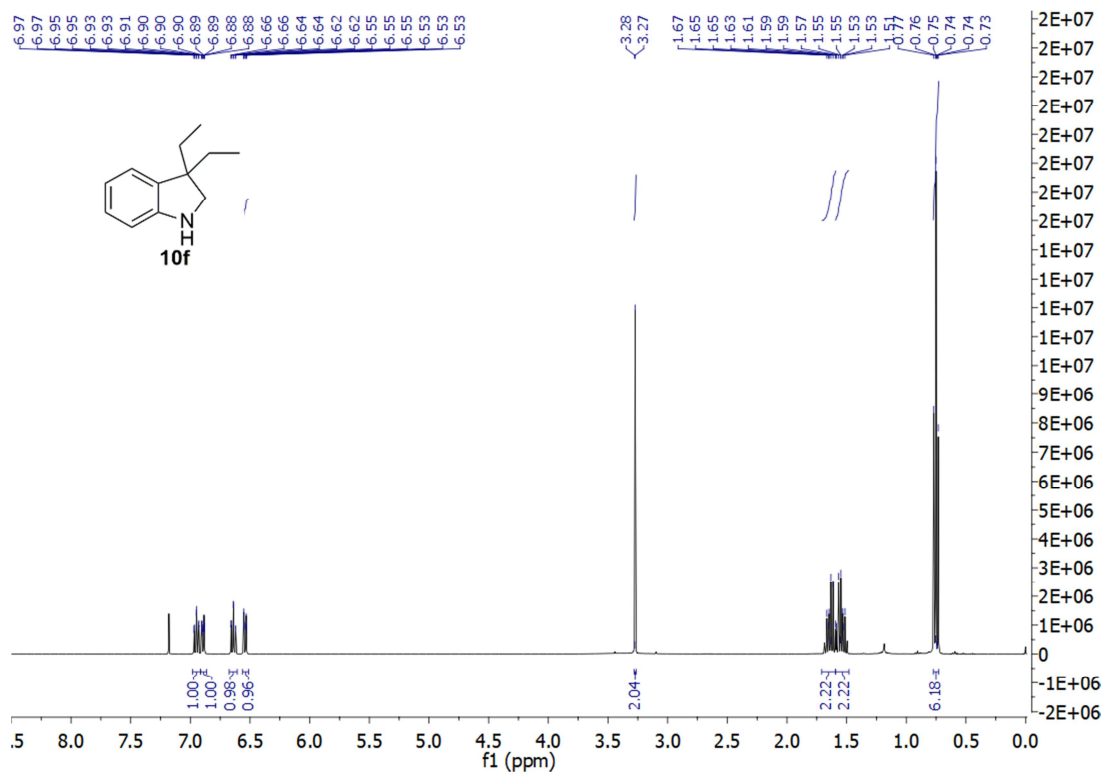

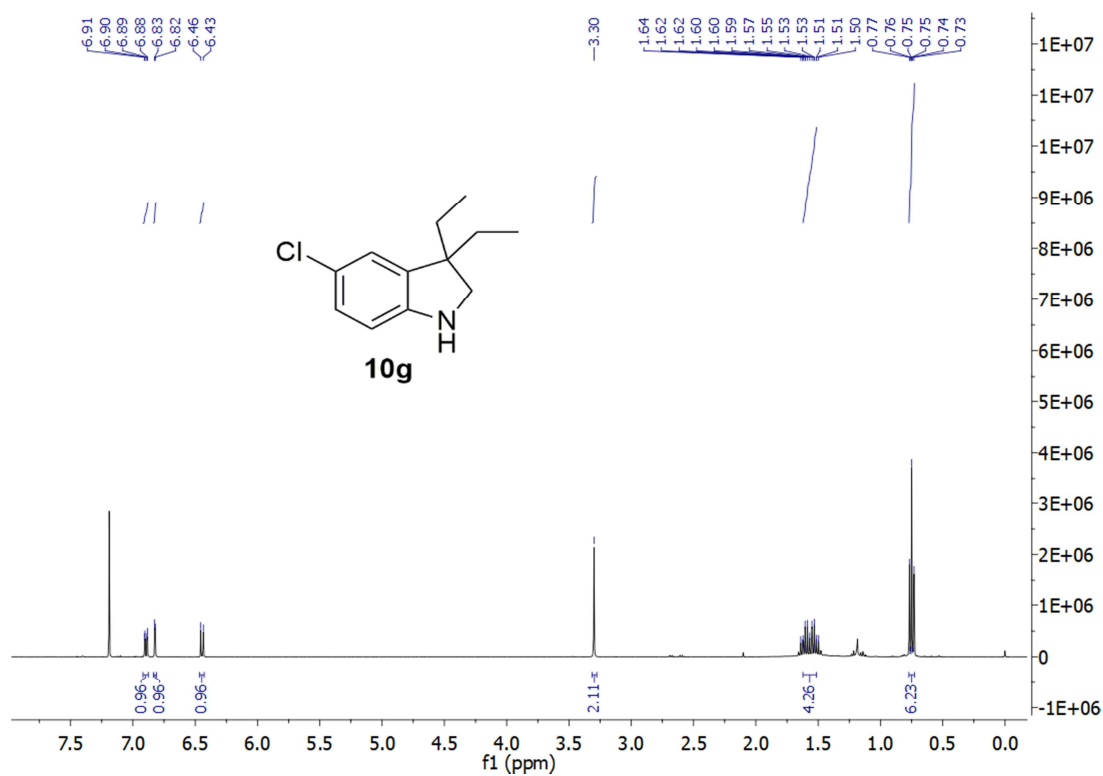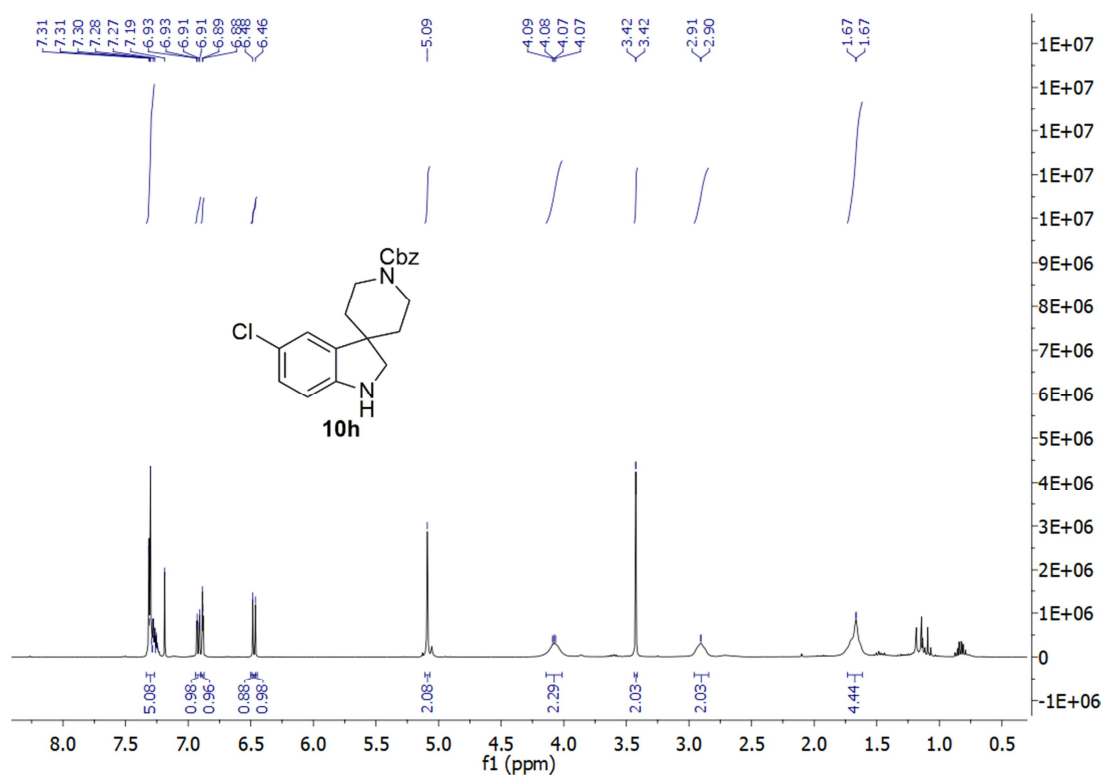

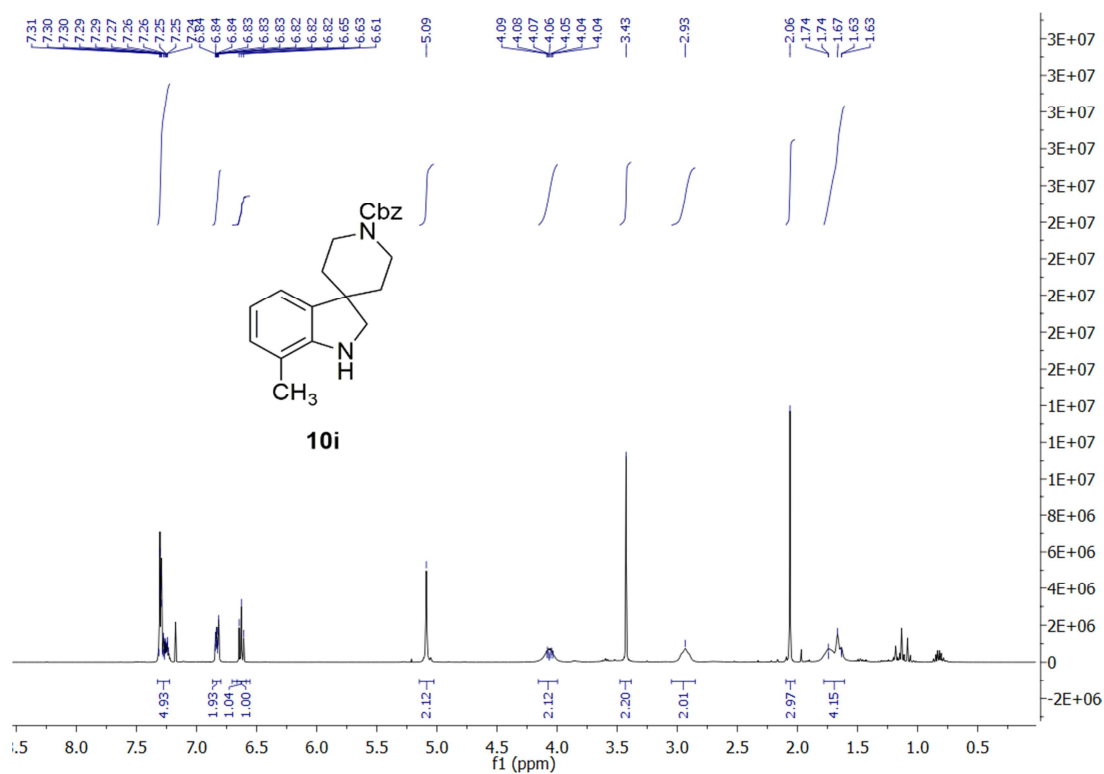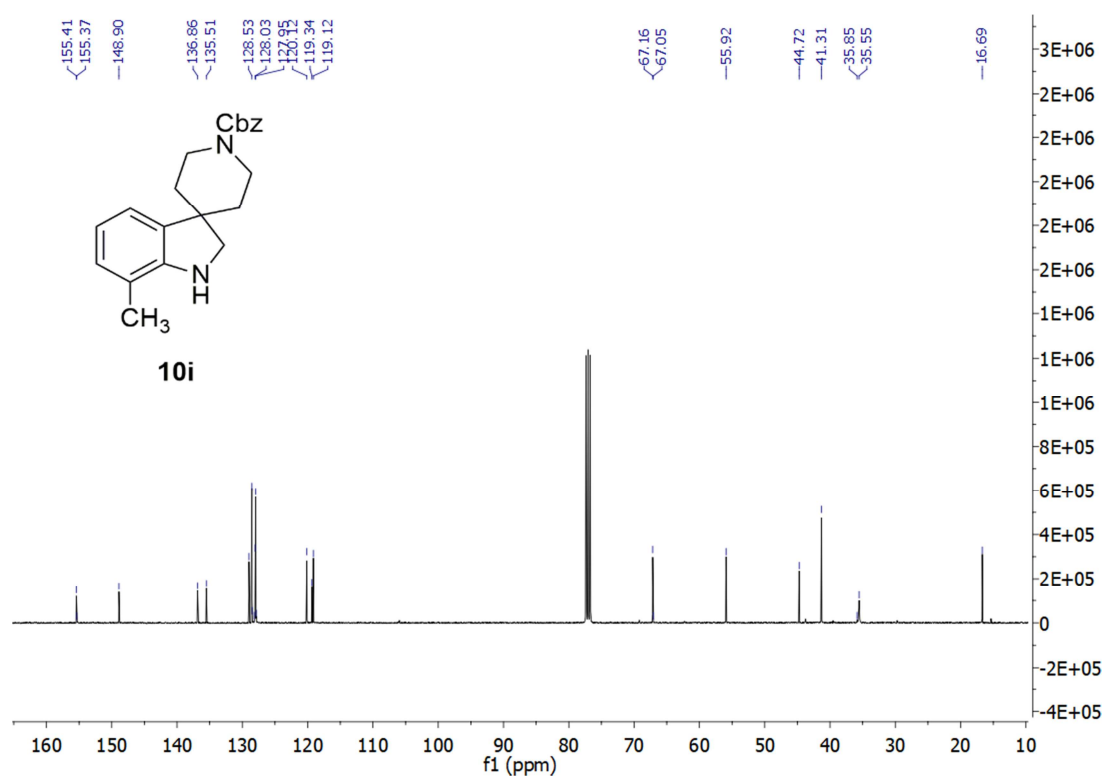

Supplement: d0re00329h1.pdf [file d0re00329h1.pdf]
